# Supplementary material for: Efficacy and Safety of Biosimilar SAR342434 Insulin Lispro in Adults with Type 2 Diabetes, Also Using Insulin Glargine: SORELLA 2 Study
Source: PubMed Central journal article supplement (PMC5770084; doi:10.1089/dia.2017.0281), 2018-01-01
Supplement: Supp_Figure1.pdf [file Supp_Figure1.pdf]

# Supplementary Data

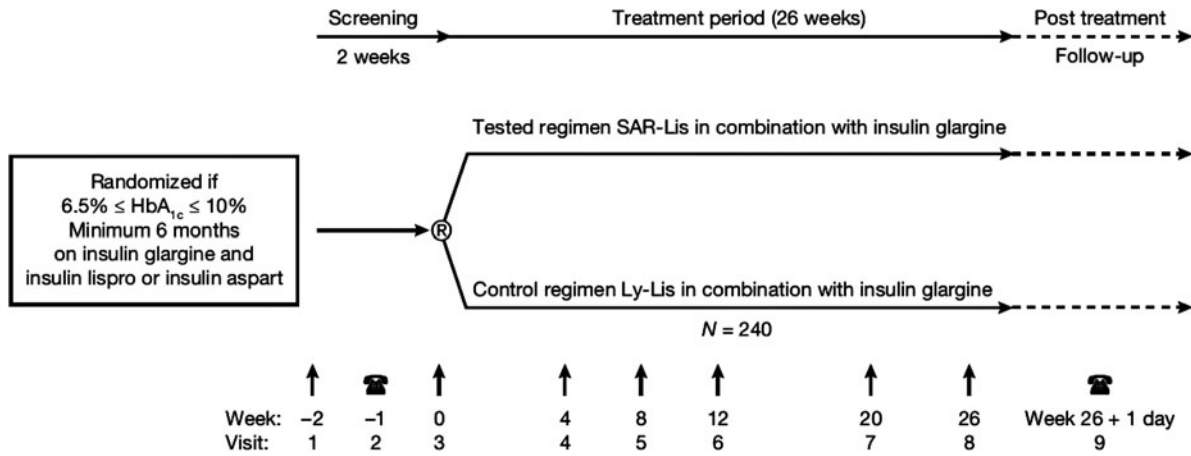

SUPPLEMENTARY FIG. S1. Study design.
