# Supplementary material for: Efficacy and Safety of Biosimilar SAR342434 Insulin Lispro in Adults with Type 2 Diabetes, Also Using Insulin Glargine: SORELLA 2 Study
Source: PubMed Central journal article supplement (PMC5770084; doi:10.1089/dia.2017.0281), 2018-01-01
Supplement: Supp_Figure2.pdf [file Supp_Figure2.pdf]

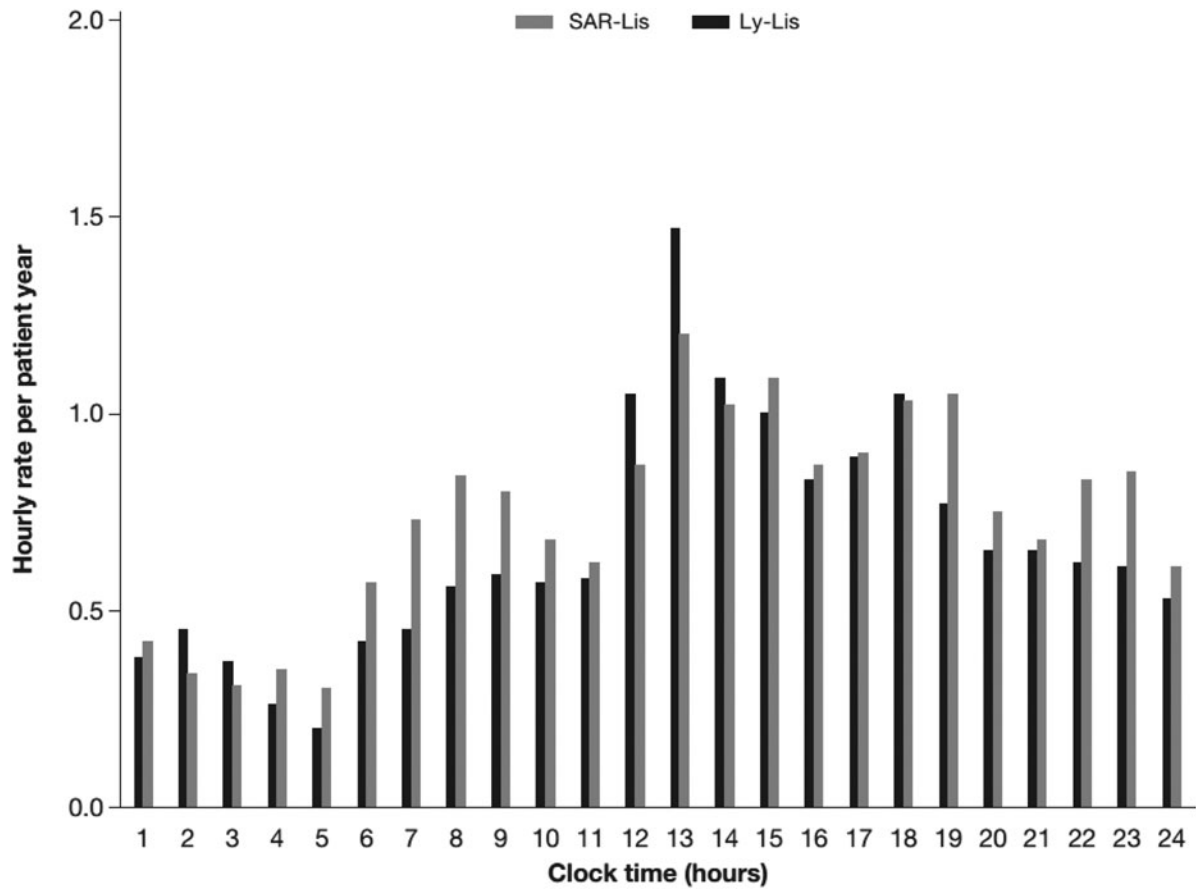

**SUPPLEMENTARY FIG. S2.** Hourly rate of severe and/or confirmed hypoglycemia  $\leq 3.9$  mmol/L (70 mg/dL) per patient-year during the 6-month on-treatment period—safety population.
